# Supplementary material for: Analysis of the Effectiveness of the Ad26.COV2.S Adenoviral Vector Vaccine for Preventing COVID-19
Source: PubMed Central journal article supplement — JAMA Netw Open. 2021 Nov 2;4(11):e2132540. doi: 10.1001/jamanetworkopen.2021.32540 (PMC8564583; doi:10.1001/jamanetworkopen.2021.32540), 2021-11-02
Supplement: jamanetwopen-e2132540-s001.pdf [file jamanetwopen-e2132540-s001.pdf]

## Supplementary Online Content

Corchado-Garcia J, Zemmour D, Hughes T, et al. Analysis of the effectiveness of the Ad26.COV2.S adenoviral vector vaccine for preventing COVID-19. *JAMA Netw Open*. 2021;4(11):e2132540. doi:10.1001/jamanetworkopen.2021.32540

**eFigure 1.** Evolution of the Number of SARS-CoV-2–Positive Cases

**eFigure 2.** Evolution of the Prevalence of SARS-CoV-2 Variants of Interest and Concern

**eTable 1.** Rates of Hospitalization, ICU Admission, and Mortality in Vaccinated vs 1:10 Propensity-Matched Unvaccinated COVID-19 Patients

**eTable 2.** Clinical Characteristics of SARS-CoV-2–Positive Cases in the Vaccinated and 1:10 Propensity-Matched- by-Comorbidities Unvaccinated Cohorts

**eTable 3.** 14-Day Rates of Hospitalization, ICU Admission, and Mortality for Vaccinated vs 1:10 Propensity-Matched-by-Comorbidities Unvaccinated COVID-19 Patients

This supplementary material has been provided by the authors to give readers additional information about their work.

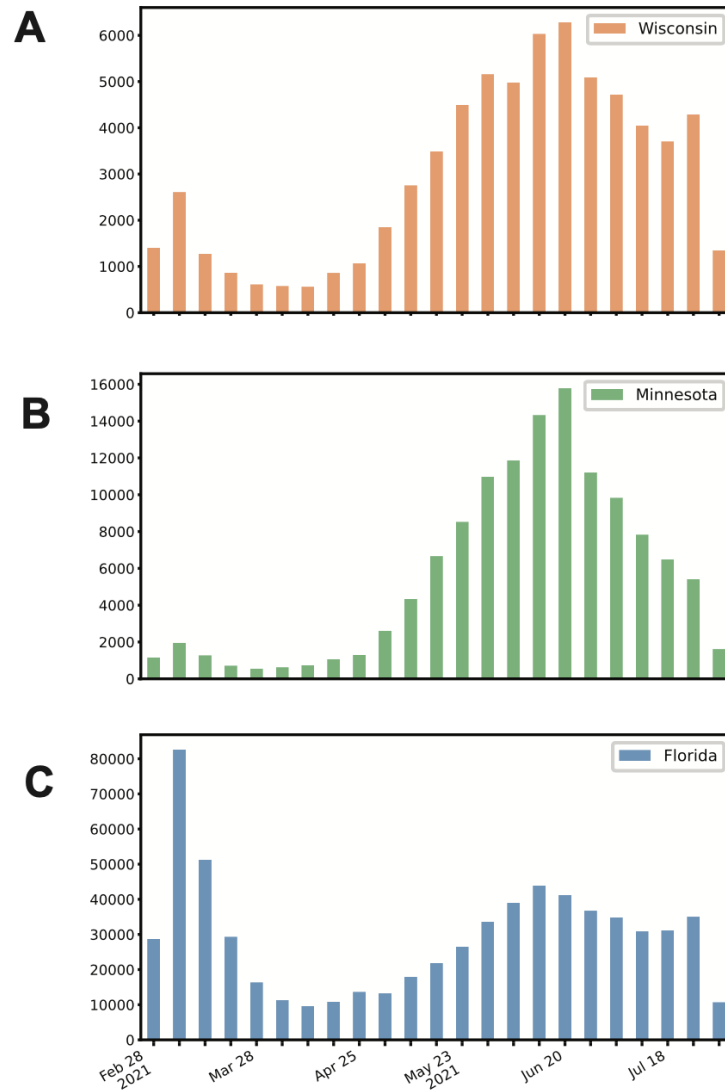

**eFigure 1.** Evolution of the Number of SARS-CoV-2–Positive Cases. Weekly number of SARS-CoV-2 positive cases reported to the CDC (blue histograms) in (A) Wisconsin, (B) Minnesota and (C) Florida between February 27, 2021 and July 22, 2021 (<https://covid.cdc.gov/covid-data-tracker/>).

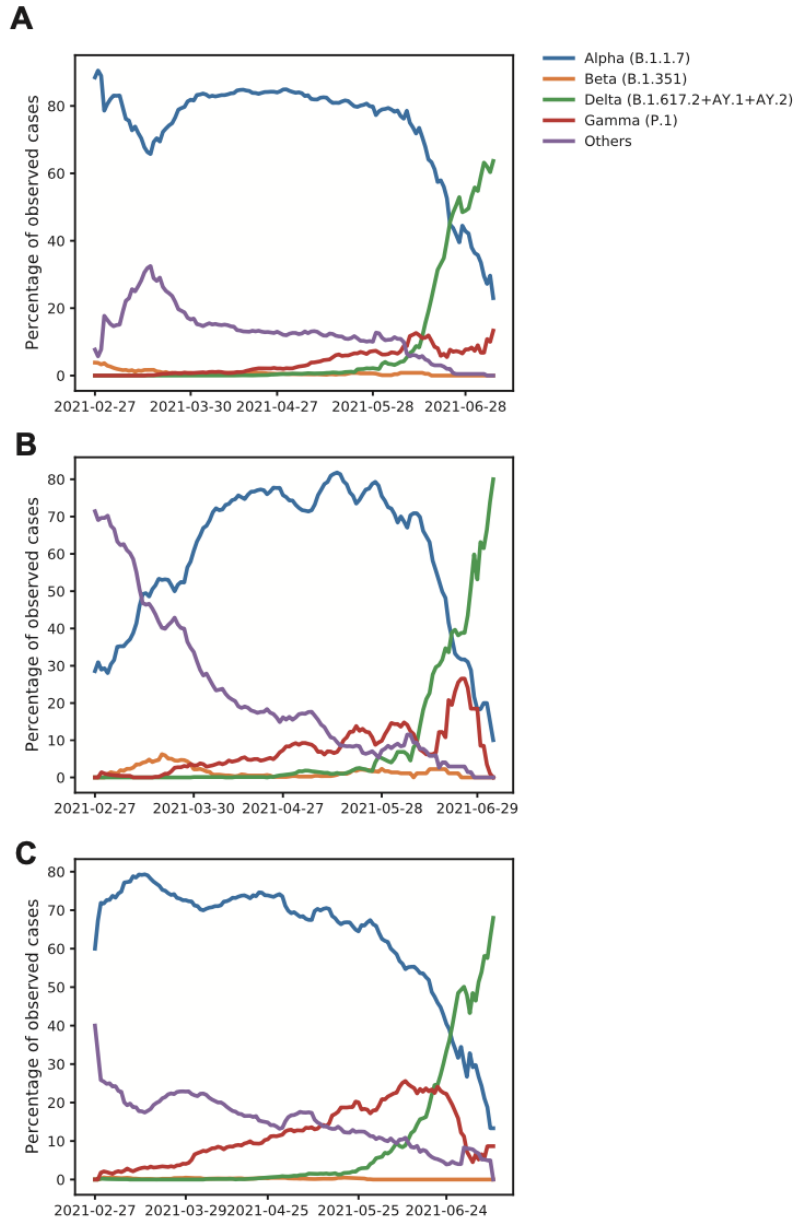

**eFigure 2.** Evolution of the Prevalence of SARS-CoV-2 Variants of Interest and Concern. Percentage of daily observations of SARS-CoV-2 variants in the states of (A) Minnesota, (B) Wisconsin and (C) Florida between February 27, 2021 and July 11, 2021.

**eTable 1.** Rates of Hospitalization, ICU Admission, and Mortality in Vaccinated vs 1:10 Propensity-Matched Unvaccinated COVID-19 Patients. For the composite and each outcome, the odds ratio (with 95% confidence interval) and Fisher exact test p-value are used to compare the odds between vaccinated and unvaccinated patients.

|                                               | Vaccinated     | Unvaccinated      | Odds Ratio (95% CI) | p-value                  |
|-----------------------------------------------|----------------|-------------------|---------------------|--------------------------|
| Hospitalization or ICU admission or mortality | 9/8880 (0.10%) | 271/88627 (0.31%) | 0.33 [0.19,0.65]    | 0.00016                  |
| Hospitalization Rate                          | 8/8881 (0.09%) | 248/88650 (0.28%) | 0.32 [0.18,0.66]    | 2.833 x 10 <sup>-4</sup> |
| ICU Admission Rate                            | 0/8889 (0.00%) | 54/88844 (0.06%)  | 0.00 [0.00,1.43]    | 0.014                    |
| Mortality Rate                                | 1/8888 (0.01%) | 12/88886 (0.01%)  | 0.83 [0.26,5.20]    | 1.00                     |

**eTable 2.** Clinical Characteristics of SARS-CoV-2–Positive Cases in the Vaccinated and 1:10 Propensity-Matched- by-Comorbidities Unvaccinated Cohorts. Highly balanced covariates with Standardized Mean Difference (SMD) < 0.1 are indicated with \*\*\*.

| Clinical covariate |                                       | SARS-CoV-2 positive vaccinated cohort (n=60) | 1:10 Propensity-matched SARS-CoV-2 positive unvaccinated cohort (n = 600) | Standardized Mean Difference (SMD) |
|--------------------|---------------------------------------|----------------------------------------------|---------------------------------------------------------------------------|------------------------------------|
| Age (Overall)      |                                       | 49.81 (17.23)                                | 49.23 (16.72)                                                             | 0.03***                            |
|                    | 18-44                                 | 21 (35.0%)                                   | 241 (40.2%)                                                               | 0.11*                              |
|                    | 45-64                                 | 27 (45.0%)                                   | 250 (41.7%)                                                               | 0.07***                            |
|                    | 65+                                   | 12 (20.0%)                                   | 109 (18.2%)                                                               | 0.05***                            |
| Comorbidities      |                                       |                                              |                                                                           |                                    |
|                    | Asthma                                | 12.0 (20.0%)                                 | 141.0 (23.5%)                                                             | 0.08***                            |
|                    | Cancer                                | 18.0 (30.0%)                                 | 183.0 (30.5%)                                                             | 0.01***                            |
|                    | Cardiomyopathy                        | 1.0 (1.7%)                                   | 10.0 (1.7%)                                                               | 0.00***                            |
|                    | Chronic kidney disease                | 5.0 (8.3%)                                   | 49.0 (8.2%)                                                               | 0.01***                            |
|                    | Chronic obstructive pulmonary disease | 2.0 (3.3%)                                   | 22.0 (3.7%)                                                               | 0.02***                            |
|                    | Coronary Artery Disease               | 5.0 (8.3%)                                   | 53.0 (8.8%)                                                               | 0.02***                            |
|                    | Heart failure                         | 4.0 (6.7%)                                   | 59.0 (9.8%)                                                               | 0.11*                              |
|                    | Hypertension                          | 26.0 (43.3%)                                 | 259.0 (43.2%)                                                             | 0.00***                            |
|                    | Obesity                               | 21.0 (35.0%)                                 | 234.0 (39.0%)                                                             | 0.08***                            |
| Ethnicity          |                                       |                                              |                                                                           |                                    |
|                    | Hispanic or Latino                    | 4 (6.7%)                                     | 55 (9.2%)                                                                 | 0.09***                            |
|                    | Not Hispanic or Latino                | 49 (81.7%)                                   | 493 (82.2%)                                                               | 0.01***                            |
|                    | Unknown                               | 7 (11.7%)                                    | 52 (8.7%)                                                                 | 0.11*                              |
| Sex                |                                       |                                              |                                                                           |                                    |
|                    | Female                                | 27 (45.0%)                                   | 266 (44.3%)                                                               | 0.01***                            |
|                    | Male                                  | 33 (55.0%)                                   | 334 (55.7%)                                                               | 0.01***                            |
| Race               |                                       |                                              |                                                                           |                                    |
|                    | Asian                                 | 0 (0.0%)                                     | 1 (0.2%)                                                                  | 0.04***                            |
|                    | Black / African American              | 3 (5.0%)                                     | 34 (5.7%)                                                                 | 0.03***                            |
|                    | Other                                 | 2 (3.3%)                                     | 26 (4.3%)                                                                 | 0.05***                            |
|                    | Unknown                               | 4 (6.7%)                                     | 21 (3.5%)                                                                 | 0.17*                              |
|                    | White / Caucasian                     | 51 (85.0%)                                   | 518 (86.3%)                                                               | 0.04***                            |
| Follow-up days     |                                       |                                              |                                                                           |                                    |
| Mean               |                                       | 35                                           | 45                                                                        |                                    |
| Median             |                                       | 27                                           | 28                                                                        |                                    |

|                    |  |    |    |  |
|--------------------|--|----|----|--|
| Q1                 |  | 12 | 12 |  |
| Q4                 |  | 49 | 79 |  |
| Standard deviation |  | 30 | 38 |  |

**eTable 3.** 14-Day Rates of Hospitalization, ICU Admission, and Mortality for Vaccinated vs 1:10 Propensity-Matched-by-Comorbidities Unvaccinated COVID-19 Patients. Patients were considered eligible for analysis if they had at least 14 days of follow-up after COVID-19 diagnosis as defined by a positive SARS-CoV-2 PCR test. For each outcome, the relative risk (and its 95% confidence interval) and Fisher exact test p value are used to compare the rates between vaccinated and unvaccinated patients. .

| <b>Outcome</b>                                        | <b>J&amp;J 1 dose, COVID positive (60 patients)</b> | <b>Matched unvaccinated, COVID positive (600 patients)</b> | <b>Relative Risk (95% CI)</b> | <b>Fisher Exact test p-value</b> |
|-------------------------------------------------------|-----------------------------------------------------|------------------------------------------------------------|-------------------------------|----------------------------------|
| Number of patients with at least 14 days of follow-up | 41                                                  | 534                                                        |                               |                                  |
| 14-Day Hospital admission rate                        | 5/44 (11%)                                          | 77/534 (14%)                                               | 0.79 (0.38, 1.9)              | 0.82                             |
| 14-Day ICU admission rate                             | 0/44 (0%)                                           | 21/534 (3.9%)                                              | 0 (0, 4.5)                    | 0.39                             |
| 14-Day Mortality rate                                 | 0/44 (0%)                                           | 0/534 (0%)                                                 | -                             | 1                                |
